# Supplementary material for: Degradation of Methylparaben Using Optimal WO3 Nanostructures: Influence of the Annealing Conditions and Complexing Agent
Source: MDPI journal article supplement (doi:10.3390/nano12234286), 2022-12-02
Supplement: s1 [file s1]

## SUPPLEMENTARY MATERIAL

# Degradation of Methylparaben Using Optimal WO<sub>3</sub> Nanostructures: Influence of the Annealing Conditions and Complexing Agent

M. Cifre-Herrando, G. Roselló-Márquez, D. M. García-García and J. García-Antón \*

Ingeniería Electroquímica y Corrosión (IEC), Instituto Universitario de Seguridad Industrial, Radiofísica y Medioambiental (ISIRYM), Universitat Politècnica de València, C/Camino de Vera s/n, 46022, Valencia, Spain

\* Correspondence: jgarciaa@iqn.upv.es

**Table S1.** Resistance values of the WO<sub>3</sub> samples with different electrolyte and annealing temperatures.

| Complexing Agent                   | Annealing Temperature / °C | R <sub>s</sub> / Ω·cm <sup>2</sup> | R <sub>1</sub> / Ω·cm <sup>2</sup> | R <sub>2</sub> / Ω·cm <sup>2</sup> |
|------------------------------------|----------------------------|------------------------------------|------------------------------------|------------------------------------|
| H <sub>2</sub> O <sub>2</sub> [49] | 400                        | 29 ± 3                             | 159 ± 11                           | 11.8 ± 1.6                         |
|                                    | 500                        | 44 ± 9                             | 107 ± 26                           | 7.6 ± 1.3                          |
|                                    | 600                        | 28 ± 6                             | 26 ± 7                             | 3.0 ± 0.9                          |
| Citric Acid                        | 400                        | 20±3                               | 43±9                               | 20.1±2.0                           |
|                                    | 500                        | 17±2                               | 5±1                                | 5.3±1.4                            |
|                                    | 600                        | 6±1                                | 1±0.9                              | 2.1±0.8                            |

**Table S2.** Density of donors (N<sub>D</sub>) and flat band potential (E<sub>FB</sub>) of the different samples.

| Complexing Agent                   | Annealing Temperature / °C | N <sub>D</sub> · 10 <sup>19</sup> / cm <sup>3</sup> | E <sub>FB</sub> / V |
|------------------------------------|----------------------------|-----------------------------------------------------|---------------------|
| H <sub>2</sub> O <sub>2</sub> [49] | 400                        | 0.4                                                 | 0.320               |
|                                    | 500                        | 1.5                                                 | 0.326               |
|                                    | 600                        | 28.5                                                | 0.312               |
| Citric Acid                        | 400                        | 2.0                                                 | 0.227               |
|                                    | 500                        | 9.4                                                 | 0.305               |
|                                    | 600                        | 33.3                                                | 0.309               |

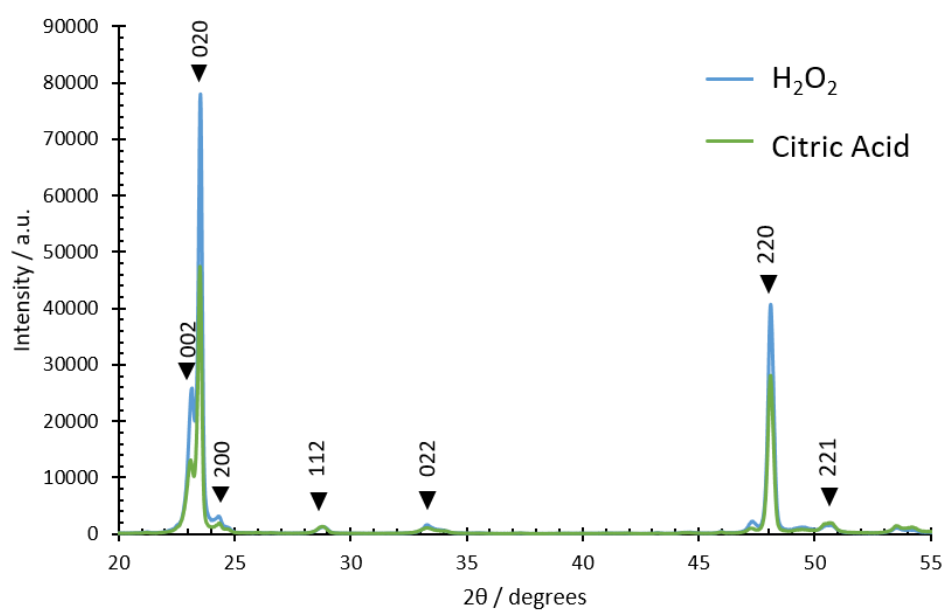

**Figure S1.** XRD plots of the samples anodized with 0.05 M  $\text{H}_2\text{O}_2$  and 0.1M Citric acid at 600 °C.

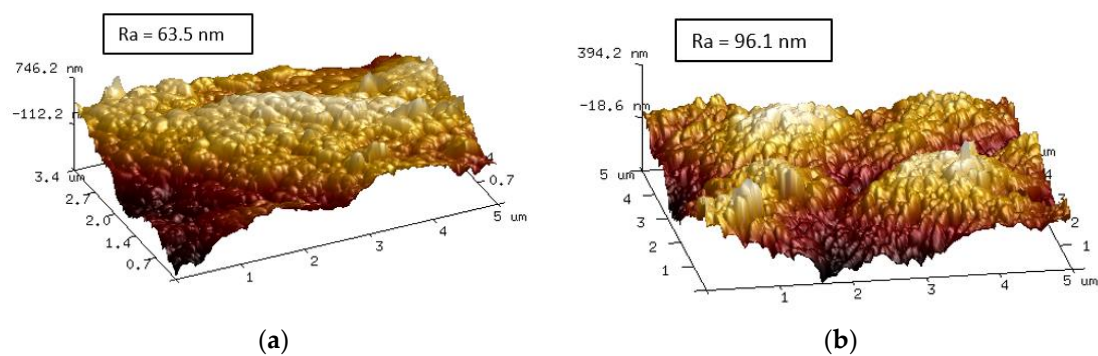

**Figure S2.** Three-dimension AFM images and roughness value (Ra) of the nanostructures annealed at 600 °C and synthesised with different electrolytes: (a)  $\text{H}_2\text{O}_2$  0.05 M and (b) Citric Acid 0.1 M.

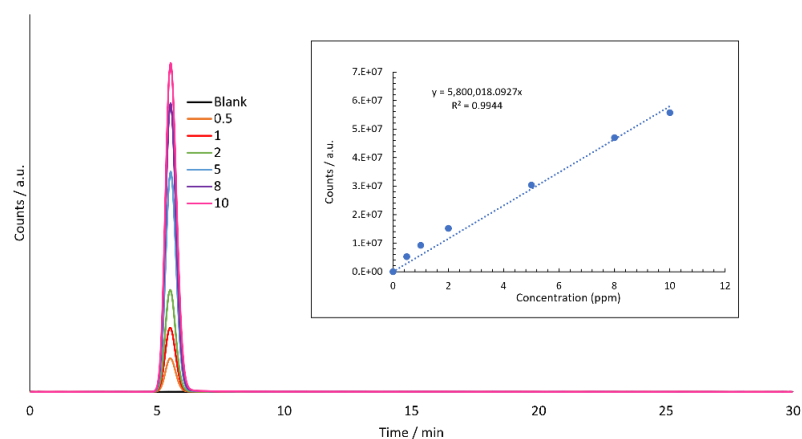

**Figure S3.** EIC at the m/z value 151.0400 of the standards of MP and inset of the calibration line.

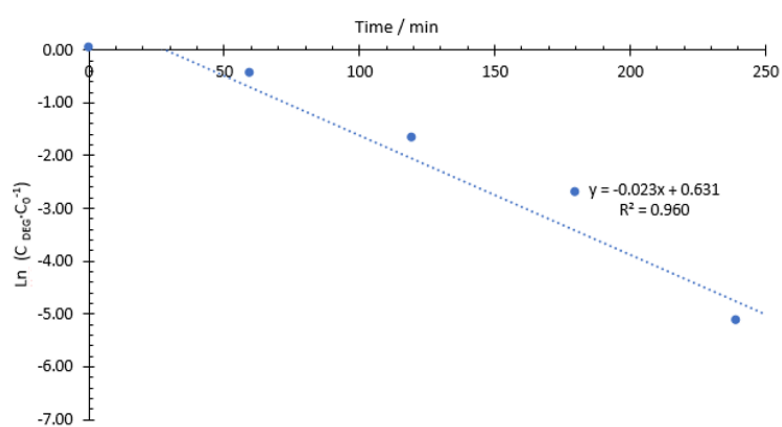

**Figure S4 .** Degradation kinetics of MP.

Table S3. Comparison of the kinetic coefficient with literature.

| Technique<br>of<br>degradation | Initial<br>concentration of<br>MP (ppm) | K (min <sup>-1</sup> ) | References |
|--------------------------------|-----------------------------------------|------------------------|------------|
| SPEF (BDD)                     | 45                                      | 0.019                  | [67]       |
| EO (BDD)                       | 100                                     | 0.0029                 | [68]       |
| SPEF                           | 1                                       | 75% - 360 min          | [69]       |
| SECh (BDD)                     | 100                                     | 0.0069                 | [70]       |
| PC (TiO <sub>2</sub> )         | 10                                      | 100% -240 min          | [71]       |
| SECh (BDD)                     | 100                                     | 0.024                  | [72]       |
| PC (TiO <sub>2</sub> )         | 100                                     | 0.018                  | [73]       |

Abbreviations: BDD: Boron-doped diamond; EF: Electro-Fenton; EO: Electro-oxidation; PC: Photocatalysis; PEF: Photoelectro-Fenton, SECh: Sonoelectrochemical; SPEF: Solar photoelectro-Fenton.

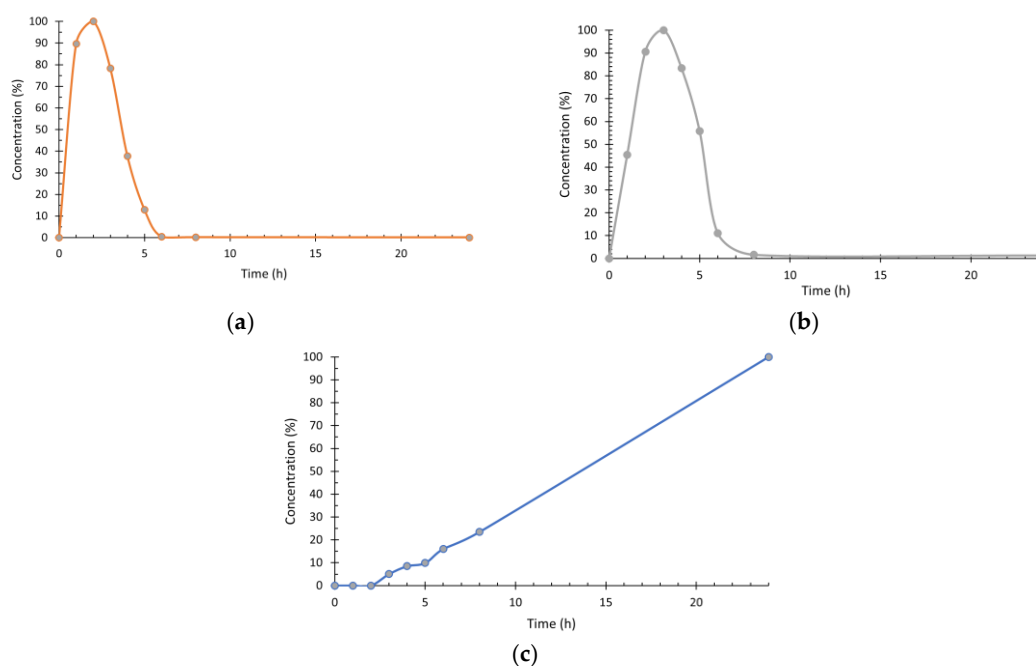

**Figure S5.** Concentration of all the intermediates in different times during the MP degradation: (a) intermediate A (b) intermediate B (c) intermediate C.

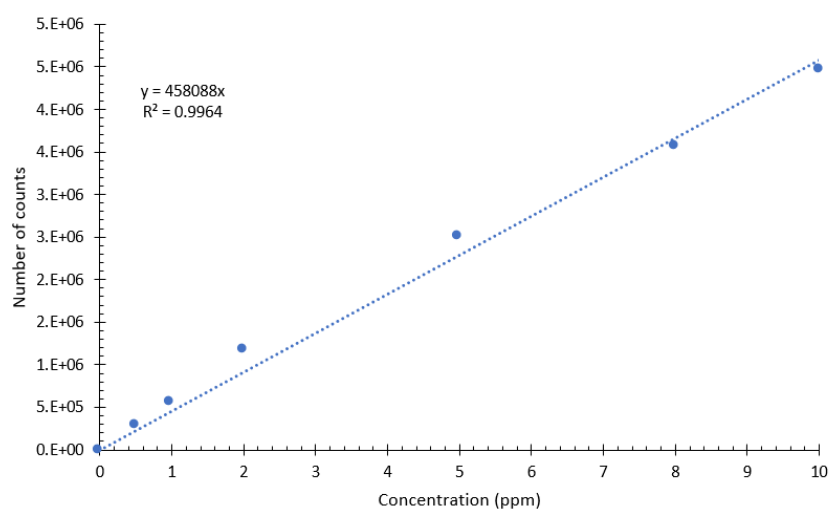

**Figure S6.** Standards of the 4-hydroxybenzoic acid ( $m/z = 136.8914$ ).

**Table S4.** Concentration (ppm) of 4-hydroxybenzoic acid during the degradation of MP.

| Time (h) | Area (counts) | Concentration (ppm) |
|----------|---------------|---------------------|
| 0        | 0             | 0                   |
| 1        | 0             | 0                   |
| 2        | 0             | 0                   |
| 3        | 60193         | 0.13                |
| 4        | 117756        | 0.26                |
| 5        | 101221        | 0.22                |
| 6        | 191869        | 0.42                |
| 8        | 279784        | 0.61                |
| 24       | 1193188       | 2.60                |
